# Supplementary material for: Alginate gels crosslinked with chitosan oligomers – a systematic investigation into alginate block structure and chitosan oligomer interaction
Source: Royal Society of Chemistry journal article supplement (doi:10.1039/d1ra01003d), 2021-01-01
Supplement: d1ra01003d1.pdf [file d1ra01003d1.pdf]

## Supporting Information:

# Alginate gels crosslinked with chitosan oligomers — A systematic investigation into alginate block structure and chitosan oligomer interaction

Georg Kopplin<sup>a</sup>, Anders Lervik<sup>b</sup>, Kurt I. Draget<sup>a</sup> and Finn L. Aachmann<sup>\*a</sup>

<sup>a</sup> *Norwegian Biopolymer Laboratory (NOBIPOL), Department of Biotechnology,  
Norwegian University of Science and Technology, 7491 Trondheim, Norway*

<sup>b</sup> *Department of Chemistry, Norwegian University of Science and Technology, 7491  
Trondheim, Norway*

\*Corresponding author. E-mail [finn.l.aachmann@ntnu.no](mailto:finn.l.aachmann@ntnu.no)

## Supporting Information

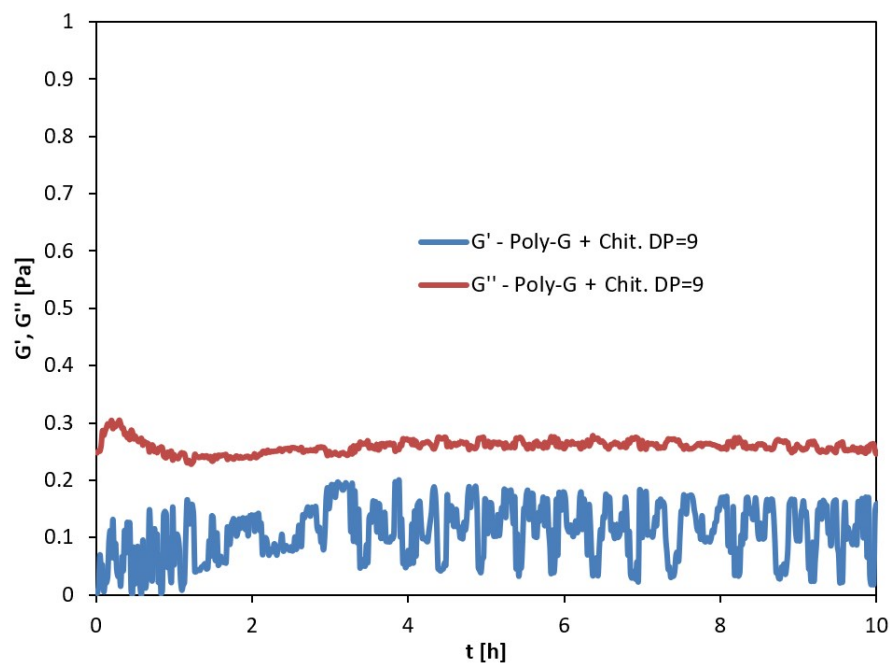

**Figure S1:** Kinetics of gelation of poly-G alginate concentration at 10 g/L (1%) with chitosan oligomers DP = 9 and concentration at 3 g/L (0.3%). GDL concentration 2 g/L.  $G'$  (blue line) and  $G''$  (red line), was determined as a function of time.

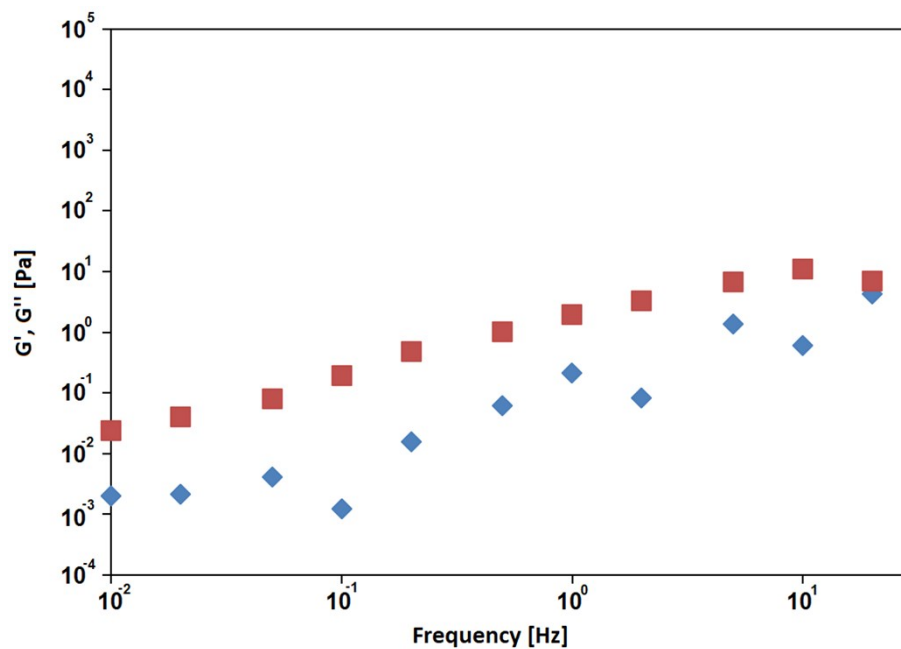

**Figure S2:** Frequency sweep of poly-MG (1.0%) and CHOS DP = 9 (0.3%), without GDL.  $G'$  (blue diamonds),  $G''$  (red squares). All measurements performed at 20°C.

**Table S1:** Complete composition of alginate hydrogels, used for rheological experiments. Alginate was ionically crosslinked with chitosan oligosaccharides (CHOS) at various CHOS/Alginate monosaccharide unit ratios. The amounts of NaOH was adjusted to reach pH to 8 when mixing CHOS and Alginate. The amount of Glucono  $\delta$ -lactone (GDL) was adjusted to reach a final pH of  $4.35 \pm 0.05$ . For calculations based on the monosaccharide ratio, the molar masses 199.12 g/mol and 197.62 g/mol were assigned to the sodium alginate unit and to the glucosamine chloride unit respectively.

| <b>SAMPLE</b>                            | <b>1</b> | <b>2</b> | <b>3</b> | <b>4</b> | <b>5</b> | <b>Unit</b> |
|------------------------------------------|----------|----------|----------|----------|----------|-------------|
| Monosacch. unit ratio: CHOS/Alginate     | 0.2      | 0.3      | 0.4      | 0.5      | 0.6      |             |
| Alginate solution (30 g/L) added         | 1.00     | 1.00     | 1.00     | 1.00     | 1.00     | g           |
| Alginate amount                          | 30.00    | 30.00    | 30.00    | 30.00    | 30.00    | mg          |
| Alginate concentration (final)           | 10.00    | 10.00    | 10.00    | 10.00    | 10.00    | g/L         |
| CHOS amount                              | 6.08     | 9.12     | 12.16    | 15.20    | 18.24    | mg          |
| CHOS solution (100 g/L) added            | 60.8     | 91.2     | 121.6    | 152.0    | 182.4    | $\mu$ l     |
| CHOS concentration (final)               | 2.03     | 3.04     | 4.05     | 5.07     | 6.08     | g/L         |
| NaOH (1 M) added                         | 14.9     | 22.4     | 29.8     | 37.3     | 44.7     | $\mu$ l     |
| GDL amount                               | 5.32     | 7.98     | 10.63    | 13.29    | 15.95    | mg          |
| GDL concentration (final)                | 1.77     | 2.66     | 3.54     | 4.43     | 5.32     | g/L         |
| H <sub>2</sub> O added (final Vol. 3 mL) | 1924     | 1886     | 1849     | 1811     | 1773     | $\mu$ l     |

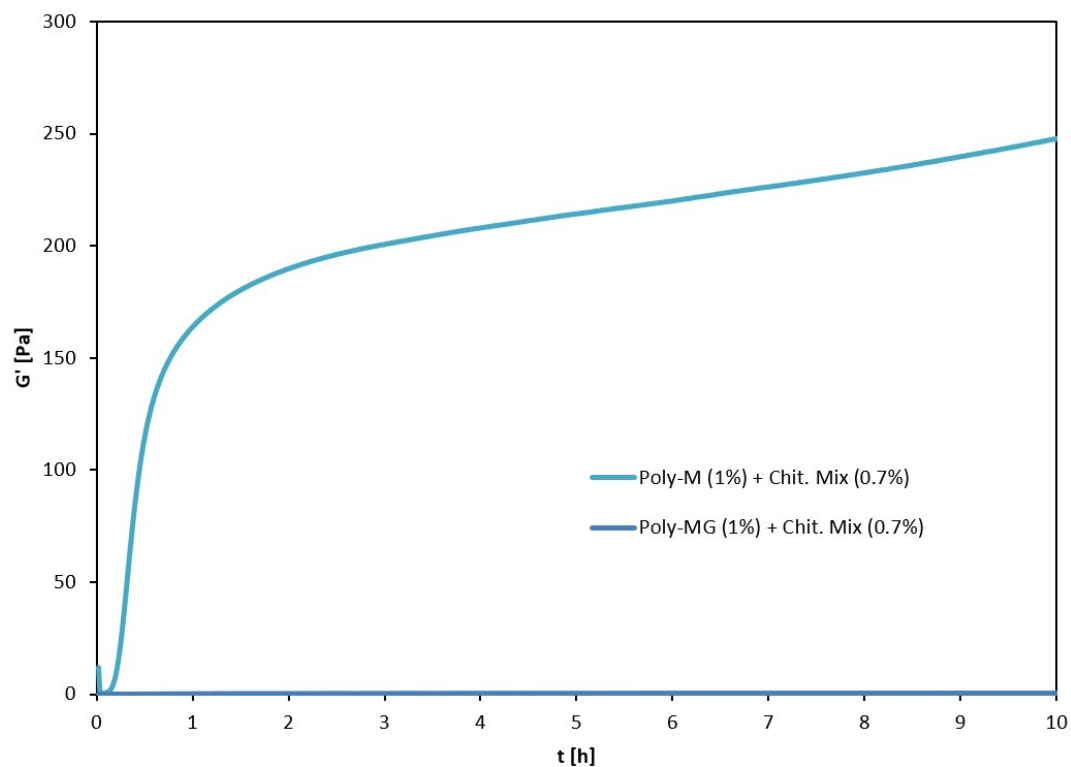

**Figure S3:** Kinetics of gelation as a function of time. Alginate concentration (poly-M: light blue, poly-MG: dark blue) at 10 g/L (1%). Chitosan oligomer mix ( $DP_n = 3.96$ ,  $FA = 0.045$ ) concentration at 7 g/L (0.7%). GDL at 2 g/L.  $G'$  was determined as a function of time.  $G''$  and  $\Delta$  are not shown in the Figure for reasons of clarity.

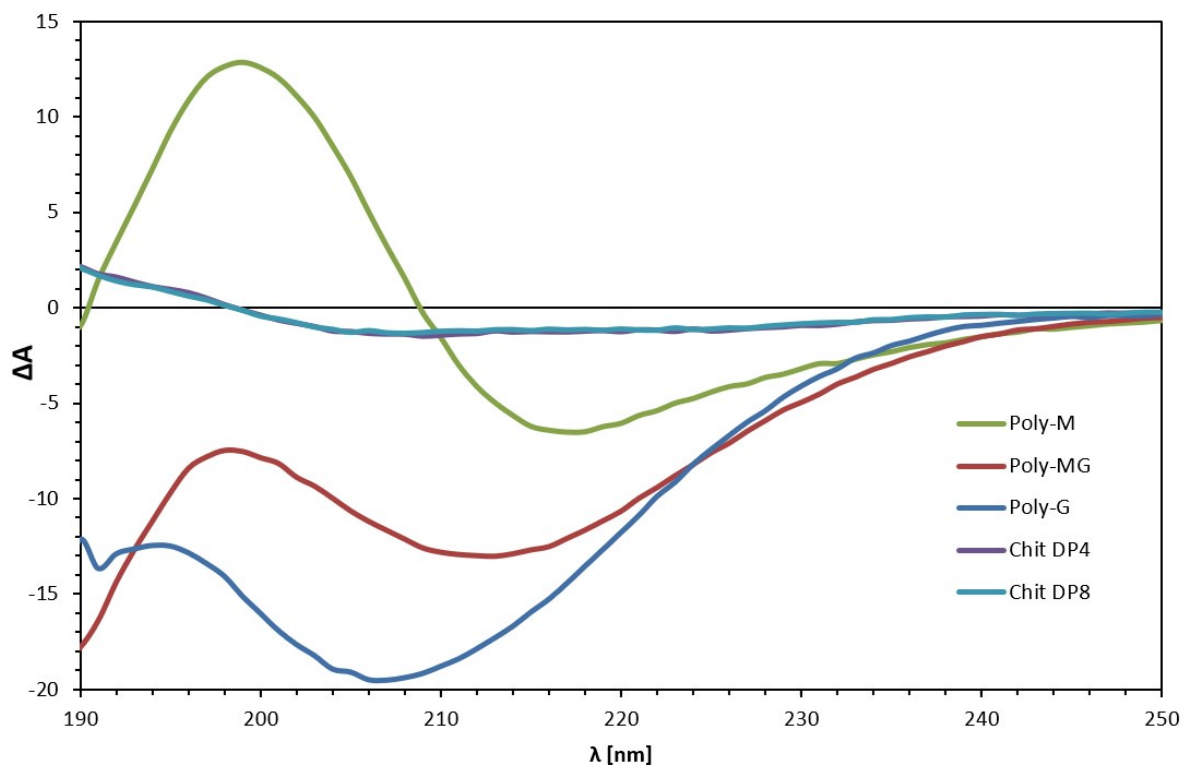

**Figure S4:** Circular dichroism spectra of poly-M (green), poly-MG (red), poly-G (blue) and chitosan DP = 4 (purple) and DP = 8 (light blue). All measurements were performed at pH = 4.5 and T = 25°C with a sample concentration of 0.4 g/L.

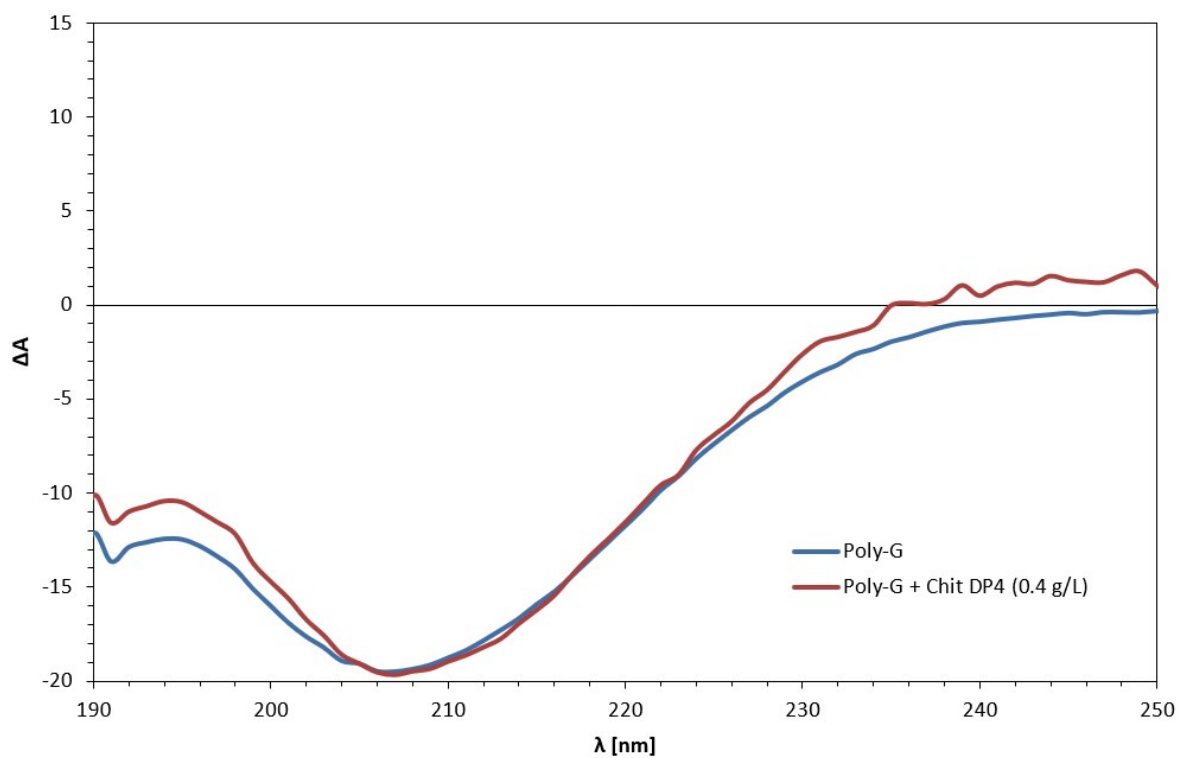

**Figure S5:** Circular dichroism spectra of poly-G (blue line) and poly-G upon addition of chitosan DP = 4 (red). The alginate and chitosan concentration was at 0.4 g/L. All measurements were performed at pH = 4.5 and T = 25°C.

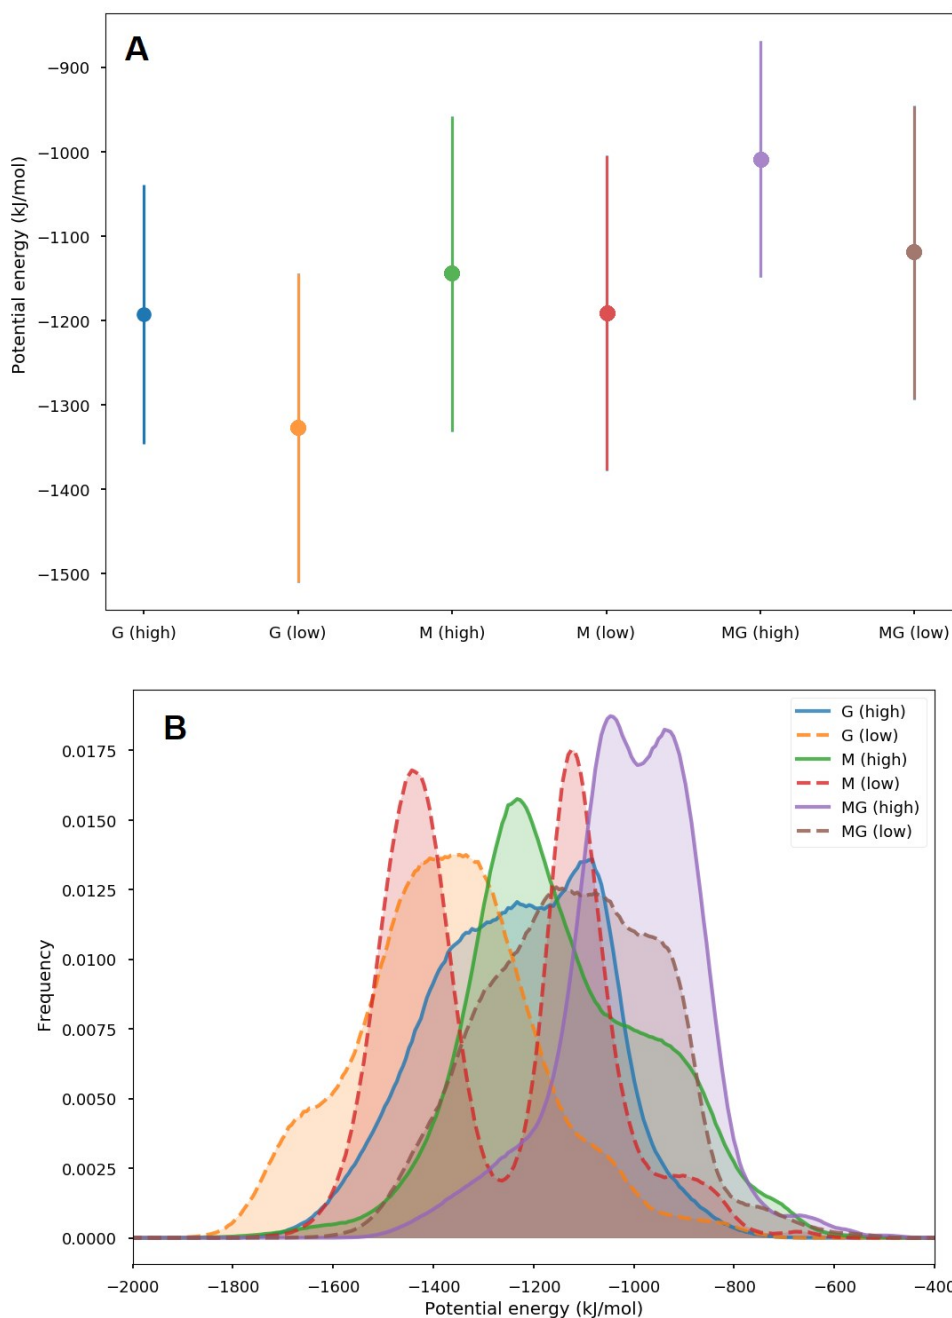

**Figure S6:** Average (A) and histograms (B) of the interaction energies between alginate oligomers (DP = 12) and a chitosan oligomer (DP = 8), obtained in MD simulations lasting 100 ns. The average interaction energy is lowest for the G oligomer with a low concentration of salt and largest for the MG-oligomer with a high concentration of salt.

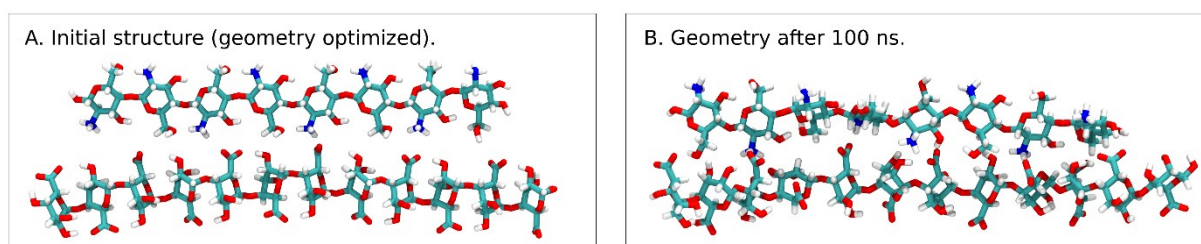

**Figure S7:** Simulation snapshots of the alginate G-oligomer and a chitosan oligomer (DP = 8) for a low concentration of salt (salt ions are not shown). (Left) The initial geometry optimized structure. (Right) The structure after a MD simulation lasting 100 ns. In this case, distortions of the molecular structures allow for a closer approach of charged groups in the molecules.

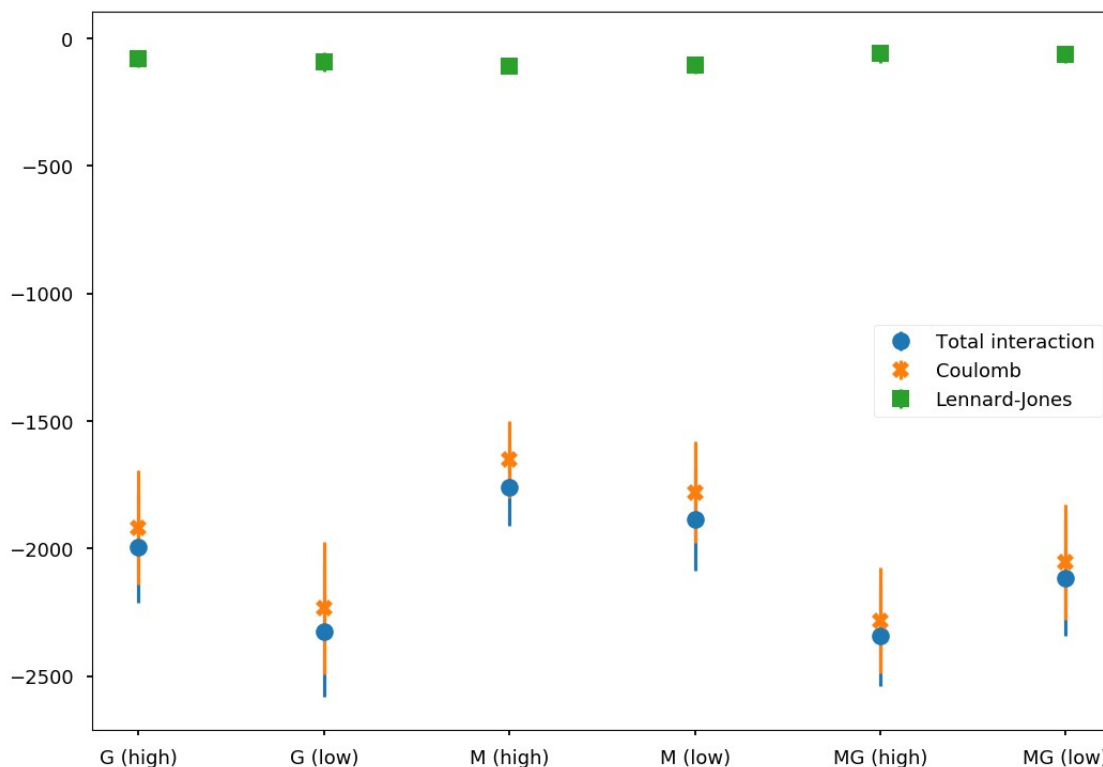

**Figure S8:** Average interaction energy between alginate (DP = 12) and chitosan (DP = 8) oligomers for 2:1 alginate:chitosan mixtures and high and low ion ( $\text{Na}^+/\text{Cl}^-$ ) concentrations.

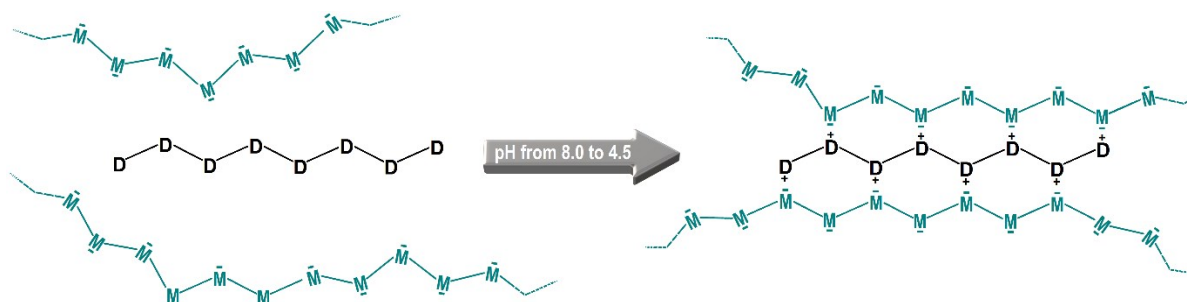

**Scheme S1:** Schematic illustration of the interaction between a chitosan oligomer (black) and poly-M alginate (green) at different pHs. Monosaccharide units: glucosamine (D), mannuronate (M). At  $\text{pH} \leq 8$  the amino groups of chitosan are mostly uncharged, while the carboxyl groups of alginate are mostly charged. At  $\text{pH} 4.0\text{--}5.0$  both chitosan and alginate are predominantly charged, leading to ionic crosslinking of the two components and a zipper-like chain alignment due to the similar charge distance in both compounds.
